# Supplementary material for: Large-scale Gene Ontology analysis of plant transcriptome-derived sequences retrieved by AFLP technology
Source: PubMed Central journal article supplement (PMC2515857; doi:10.1186/1471-2164-9-347), 2008-07-24

# AFLP records in publications

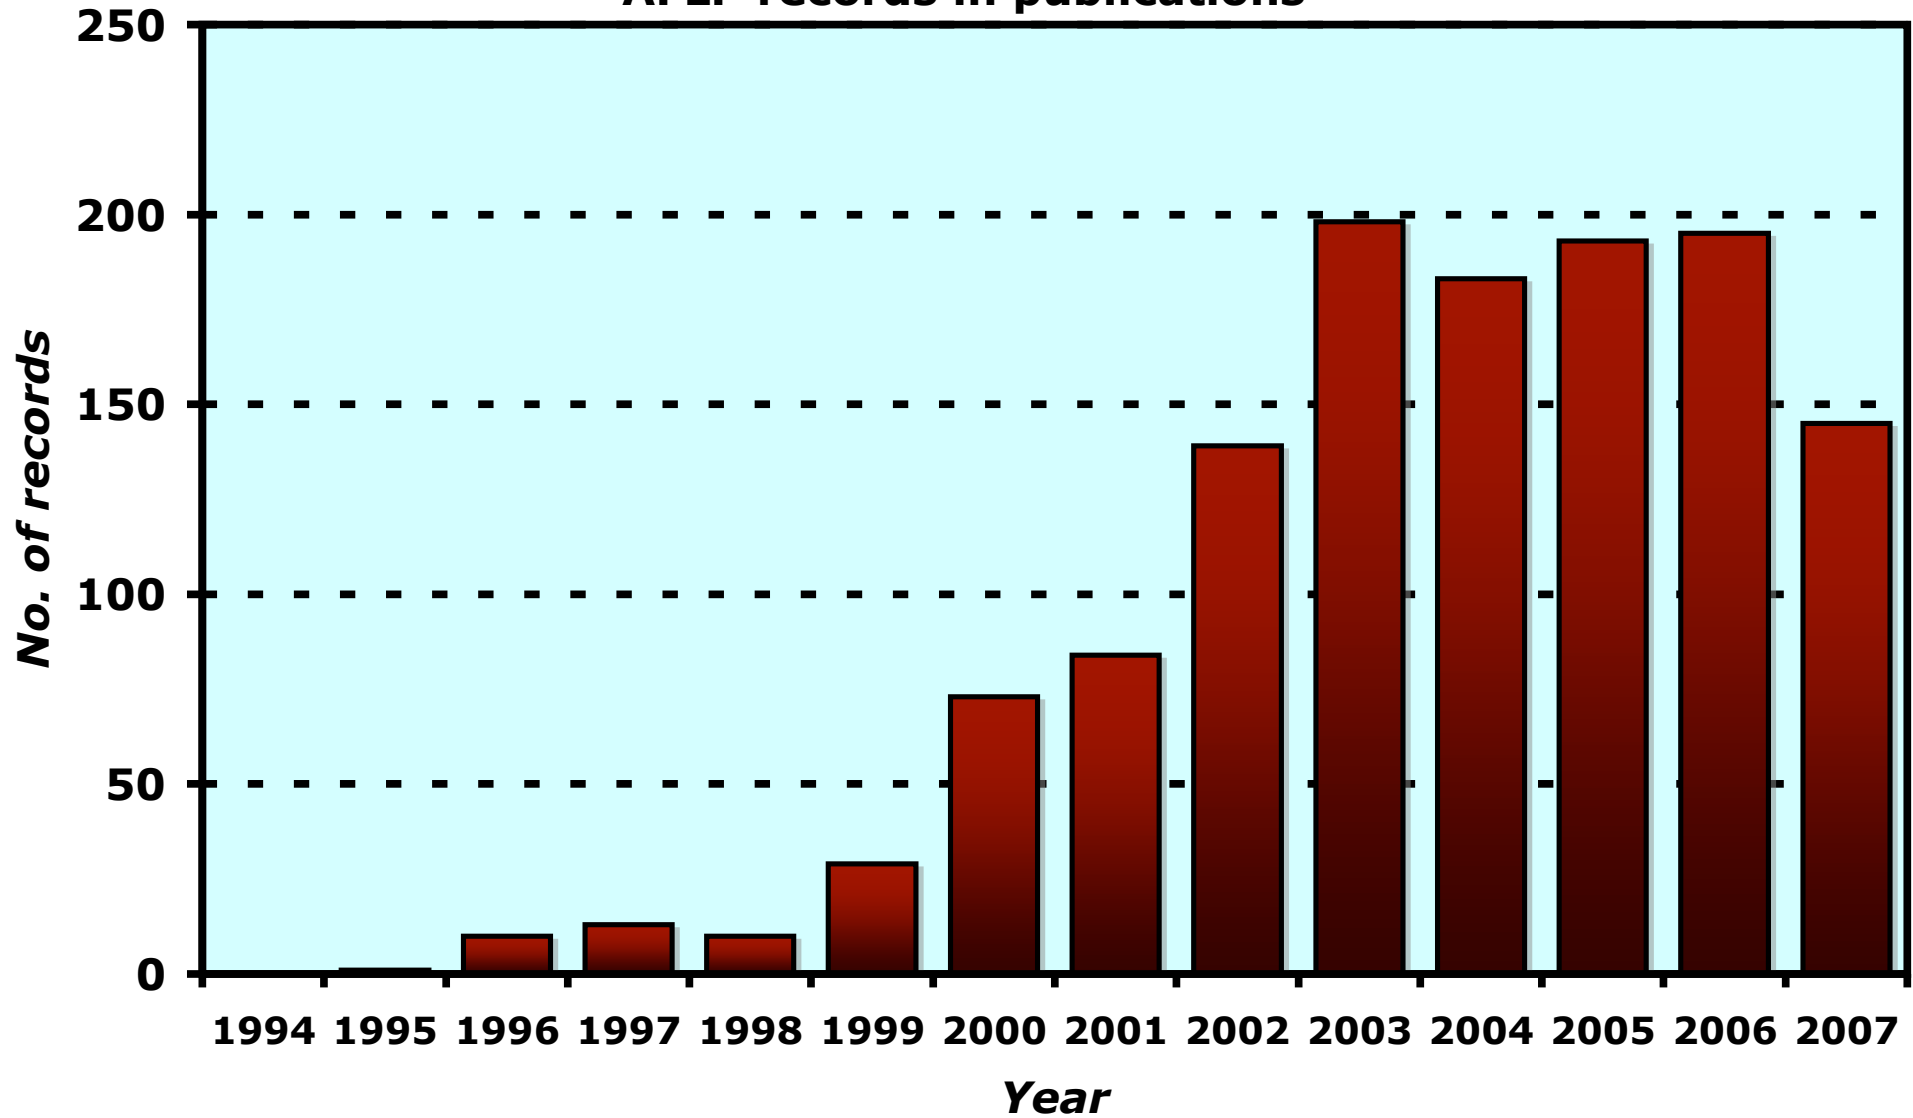

Supplement: 1471-2164-9-347-S1.pdf [file 1471-2164-9-347-S1.pdf]
